# Supplementary material for: Effects of extraction methods on protein properties obtained from paddy rice and germinated paddy rice
Source: PeerJ. 2021 May 4;9:e11365. doi: 10.7717/peerj.11365 (PMC8103913; doi:10.7717/peerj.11365)
Supplement: Supplemental Information 1 [file peerj-09-11365-s001.xlsx]

## Sheet: Daw data
Samples	Extraction Methods	Replication	Protein Concentration(g/100g)	Tp	ΔH	Total Phenolic Compound	DPPH	FRAP	Trp
1	1	1	46.1705	78.48	-0.61	0.790909	0.313919	2.6879	1
1	1	2	45.7642	78.33	-0.45	0.688636	0.317582	2.70806	1
1	2	1	42.8179	91.99	-0.11	0.0501832	0.0501832	3.22419	2
1	2	2	43.4782	91.99	-0.22	0.03	0.035641	3.11129	2
1	3	1	46.2721	80.99	-0.13	1.64318	0.405495	2.47823	3
1	3	2	48.4565	80.08	-0.19	1.90455	0.467766	2.12339	3
2	1	1	40.3287	78.72	-0.5	0.722727	0.200366	3.66371	4
2	1	2	41.2431	78.88	-0.59	0.802273	0.171062	3.40565	4
2	2	1	42.8687	98.55	-0.13	0.0684982	0.0684982	2.24032	5
2	2	2	41.3955	92.88	-0.1	0.0648352	0.0648352	1.92177	5
2	3	1	44.7482	77.93	-0.15	2.95	0.141758	4.1879	6
2	3	2	44.4434	80.88	-0.13	2.84773	0.127106	3.74032	6
Sample	Extraction method	Replication	Trp
1=Paddy rice	1= SDS Reagent Extraction Method	1=1	1=PR,SDS
2=Germinated paddy rice	2= Alkaline Extraction Method	2=2	2=PR,Alkaline
	3= Enzyme Extraction Method		3=PR,Enzyme
			4=GPR,SDS
			5=GPR,Alkaline
			6=GPR,Enzyme
